# Supplementary material
Source: Springer Nature journal article supplement (https://www.springermedizin.de/resource/supplementary/12873_2011_164_MOESM5_ESM.pdf/9431566)

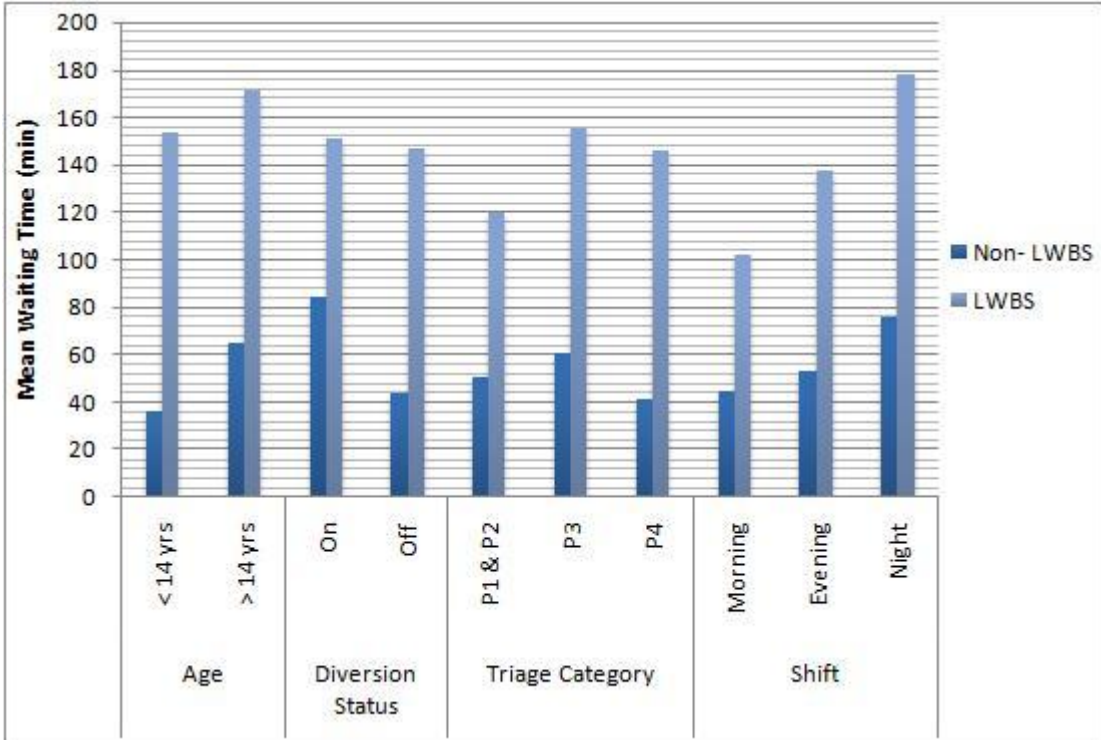

Supplement: MOESM5 [file 9431566]
